# Supplementary material
Source: PubMed Central journal article supplement (PMC7962889)
Supplement: mjy024supplementarymaterial.pdf [file mjy024supplementarymaterial.pdf]

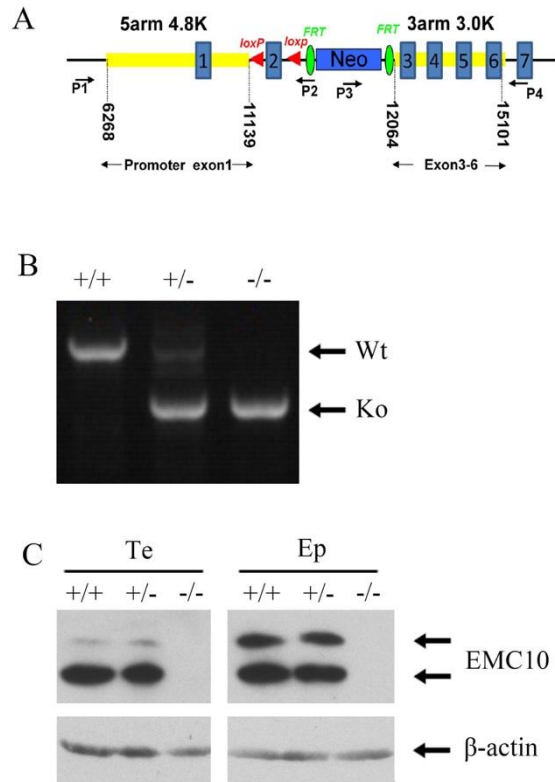

**Supplementary Figure S1. Characterization of *Emc10* knockout mice.**

(A) Targeting strategy to inactivate mouse *Emc10* allele by deleting exon 2. (B) The genotyping of gene disruption was confirmed by PCR. (C) EMC10 protein was totally deleted in homogenous mice by western blotting. EMC10 proteins were detectable by western blotting in the testis (Te) and epididymis (Ep) from wild type (+/+), heterozygous (+/-) mice but not homogenous (-/-) mice.  $\beta$ -actin was used as the protein loading control.

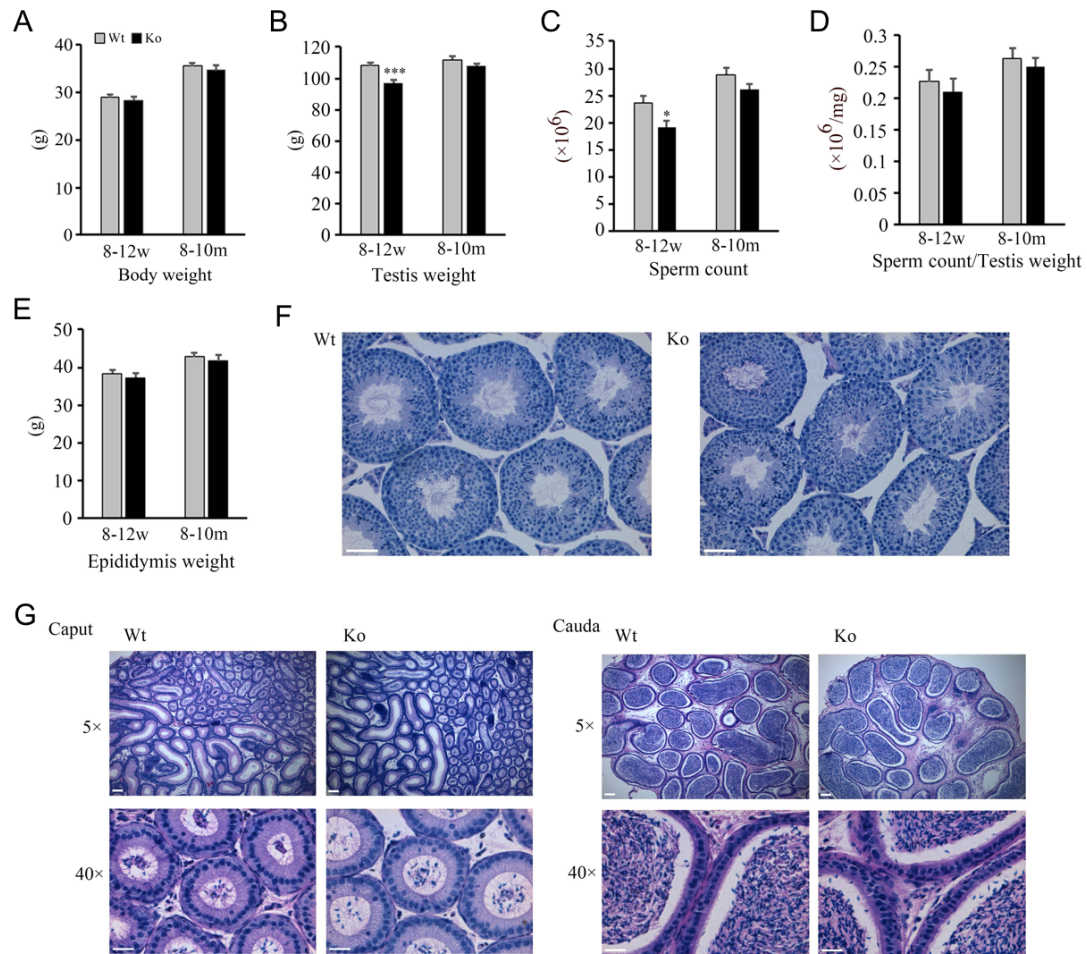

**Supplementary Figure S2. Phenotypes associated with male fertility in wild type and *Emc10*-null mice.**

The weights of whole body (A), testis (B) and epididymis (E) as well as sperm count (C) and the ratio of sperm count to testis weight (D) in *Emc10*<sup>+/+</sup> and *Emc10*<sup>-/-</sup> male mice were shown in histograms (n = 26 at 8-12 weeks; n = 16 at 8-10 months). Microscopic analysis of testis (F) and epididymis (G) from *Emc10*<sup>+/+</sup> and *Emc10*<sup>-/-</sup> male mice. The testes and epididymides were dissected and fixed in 4% paraformaldehyde, embedded in paraffin, and cut into 5  $\mu$ m sections. Tissues were stained with H&E and examined with 5 $\times$  objective lens (scale bar, 100  $\mu$ m) and 40 $\times$  objective lens (scale bar, 25  $\mu$ m). Data in bar graphs are presented as mean  $\pm$  SEM. \**P* < 0.05; \*\*\**P* < 0.001.

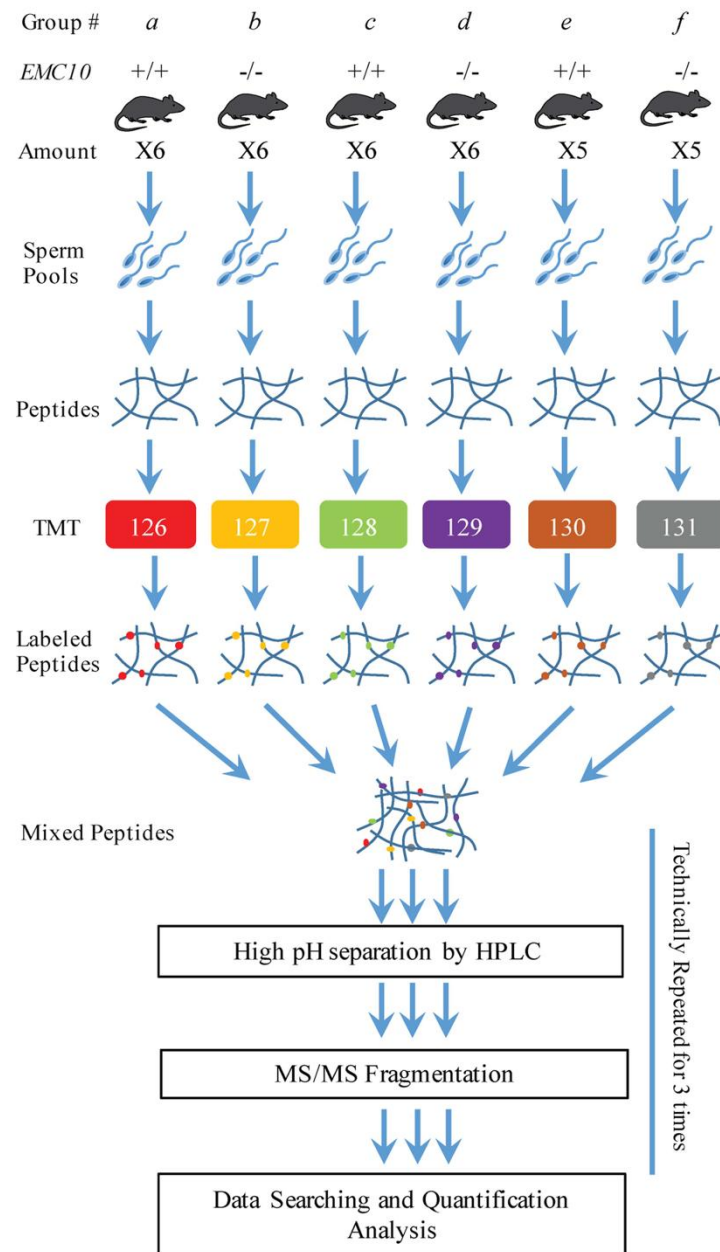

**Supplementary Figure S3. Workflow chart of the Tandem Mass Tag (TMT) 6-plex labelling experiment.**

Totally, 34 mice were divided into 6 groups including groups a, c, and e for wild type mice, and groups b, d, and f for *Emc10*<sup>-/-</sup>. There were 6 mice in groups a, b, c, and d, and 5 in groups e and f, respectively. TMT- labelled peptides were mixed in equal proportions. Mixed peptides were analyzed by tandem mass spectrometry and repeated in triplicate.

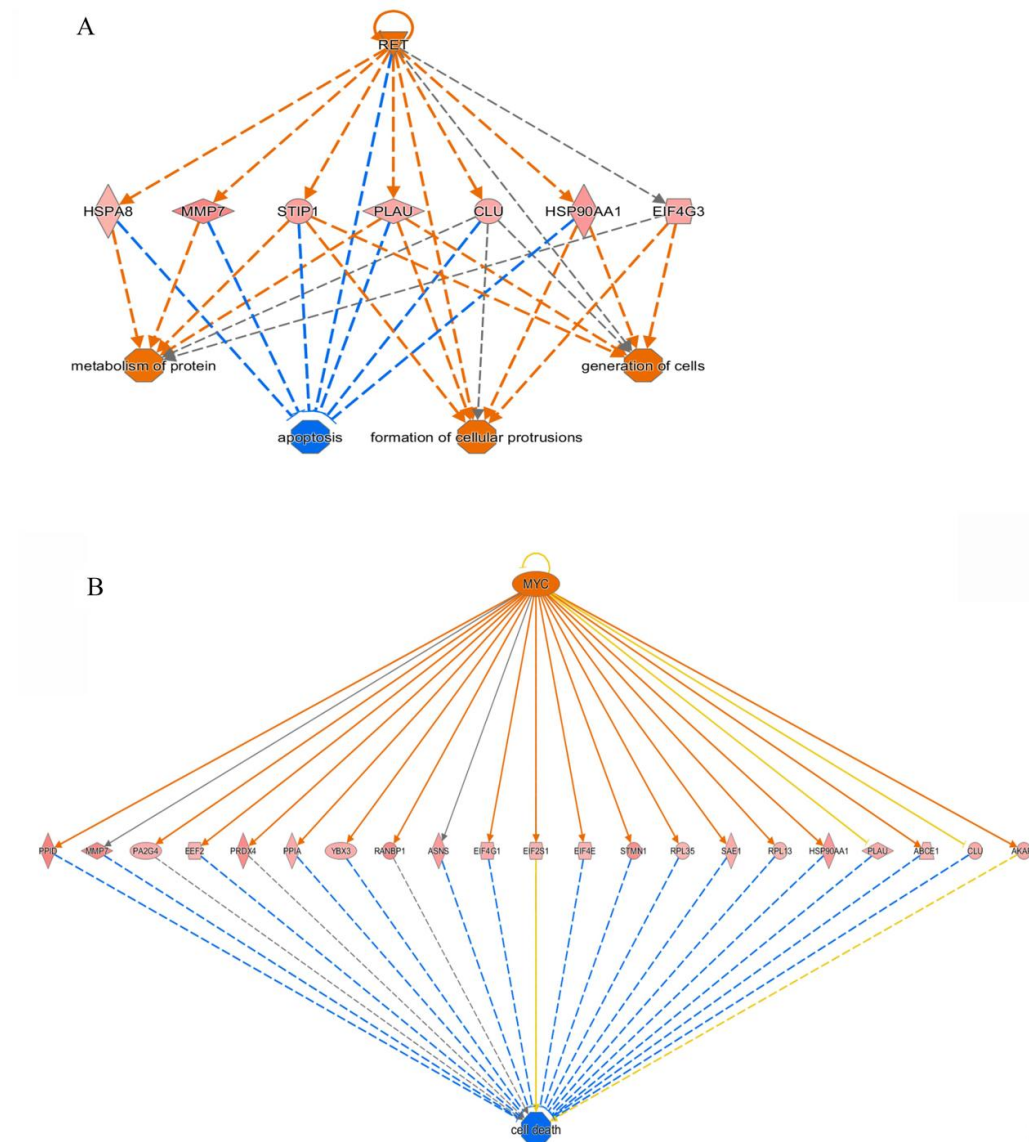

**Supplementary Figure S4. The predicted work modules based on the 327 significantly altered proteins (> 1.5-fold) in the sperm of *Emc10*<sup>-/-</sup> mice.**

The predicted work modules were based on the regulation of RET (A) and MYC (B) pathways, which were significantly activated in *Emc10*<sup>-/-</sup> sperm cells. Orange labelling indicates increased measurement (e.g. RET and MYC), or the effects predicted to be activated (e.g. the metabolism of protein, the formation of cellular protrusions and the generation of cells), while the blue characters represent the effects predicted to be inhibited (e.g. apoptosis and cell death). The dashed lines indicate the predicted interactions between network proteins, and the directions of the interaction are indicated by orange arrows (activation), blue-blocked lines (inhibition) or grey lines (effect not predicted).

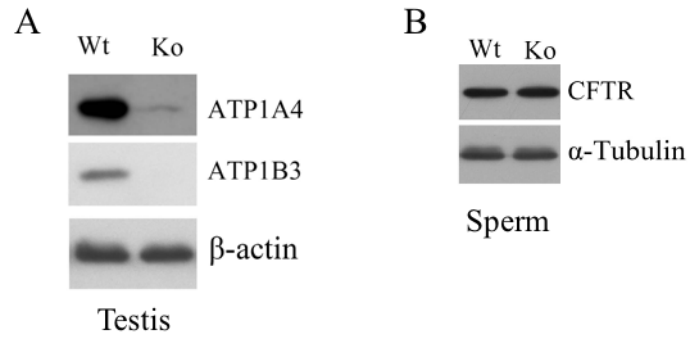

**Supplementary Figure S5. The protein levels of ATP1A4, ATP1B3 and CFTR in wild type (Wt) and *Emc10*<sup>-/-</sup> (Ko) mice.**

(A) The expression of ATP1A4 and ATP1B3 was measured in testis tissues by western blotting.  $\beta$ -actin was used as the protein loading control. (B) CFTR expression was detected in epididymal sperm.  $\alpha$ -tubulin was used as control.

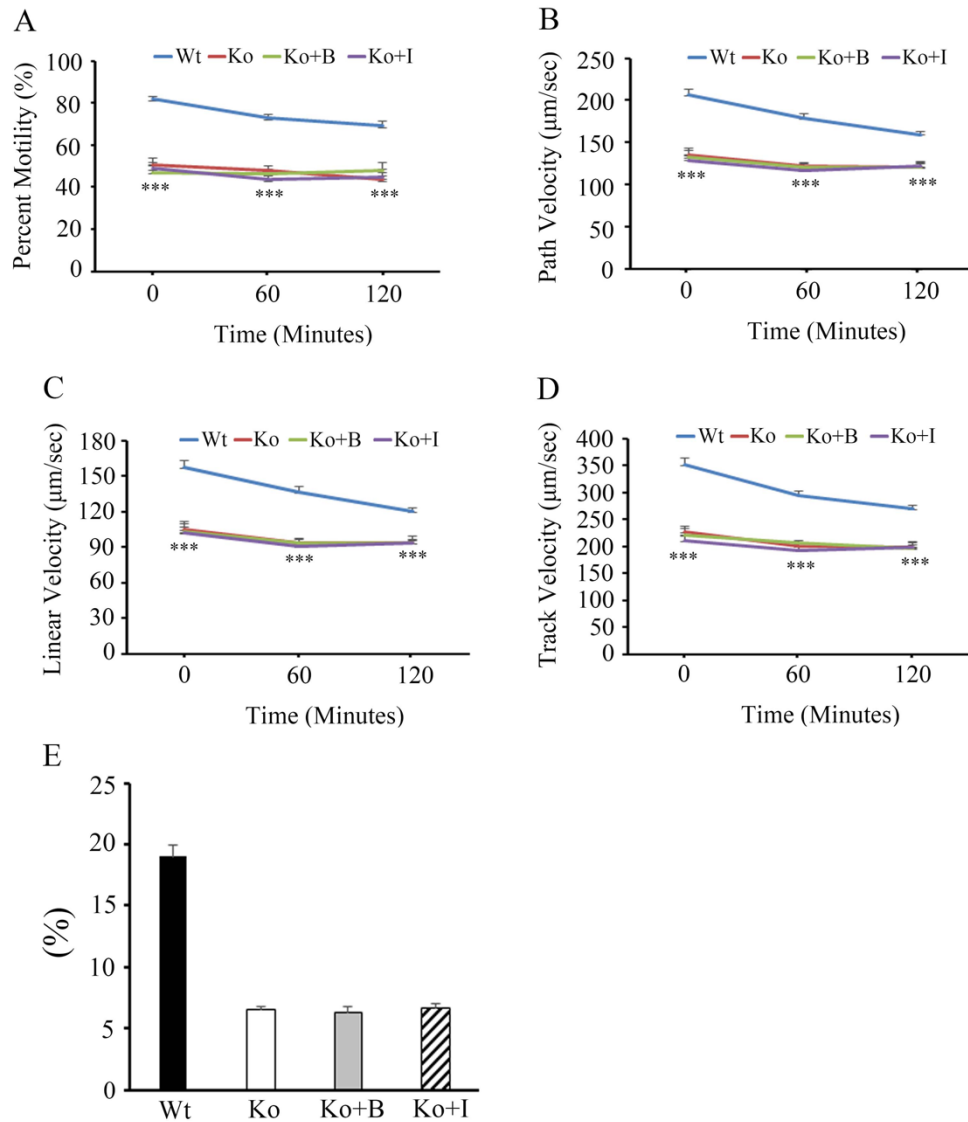

**Supplementary Figure S6. Effects of 8-Bromo-cAMP and IBMX on *Emc10*<sup>-/-</sup> sperm function.**

The motility parameters including the motility percentage (A), path velocity (B), linear velocity (C), and track velocity (D), as well as acrosome reaction (E) of spermatozoa from WT and *Emc10*-null mice were unable to be rescued by adding 8-Bromo-cAMP or IBMX to the medium. Data are presented as mean  $\pm$  SEM. n = 7, \*\*\*p<0.001, when compared with controls at each time point.

## Supplementary Methods

### *Sperm protein digestion and TMT labelling*

Seventeen *Emc10*<sup>+/+</sup> mice and 17 *Emc10*<sup>-/-</sup> mice, both of which were 8 to 12 weeks old, were randomly assigned into six groups, which were three *Emc10*<sup>+/+</sup> sperm pools and three *Emc10*<sup>-/-</sup> sperm pools. One millilitre of lysis buffer (8 M urea, 1x Protease Inhibitor Cocktail (Roche Ltd. Basel, Switzerland) was added to the pellet of sperm sample pool, followed by sonication on ice and centrifugation. 100 µg protein per condition were transferred into a new tube and adjusted to a final volume of 100 µL with 100 mM TEAB (triethylammonium bicarbonate). 5 µL of the 200 mM DTT was added and the sample incubated at 55°C for 1 h, then 5 µL of 500 mM iodoacetamide was added the sample incubated for 30 min protected from light at room temperature. For each sample, proteins were precipitated with ice-cold acetone and then were re-dissolved in 100 µL TEAB. Then proteins were typically digested with sequence-grade modified trypsin (Promega, Madison, WI, USA), and the resultant peptide mixture was labelled by chemicals from the TMT reagent kit (Pierce Biotechnology, Rockford, USA). Proteins were labelled with TMT as follows: *Emc10*<sup>-/-</sup> samples were labelled with 126, 128, and 130 isobaric tags, while *Emc10*<sup>+/+</sup> samples were labelled with 127, 129 and 131 isobaric tags. The labelled samples were combined and dried in vacuo.

### *Separation by ultra performance liquid chromatography*

The dried peptide mixture was dissolved in the buffer A (10 mM ammonium formate in water, pH 10.0, adjusted with ammonium hydroxide), and then fractionated by high pH separation by using an Aquity UPLC system (Waters Corporation, Milford, MA, USA) connected to a reverse phase column (BEH C18 column, 2.1 mm x 150 mm, 3.5 µm, 300 Å, Waters Corporation, Milford, MA, USA). High pH separation was performed on a linear gradient, starting from 0% buffer B (10 mM ammonium formate in 90% ACN, pH 10.0, adjusted with ammonium hydroxide) to 45% buffer B in 35 min (Gilar et al., 2005). The column was re-equilibrated at initial conditions for 15 min. The column flow rate was maintained at 200 µL/min and the column

temperature was maintained at room temperature. Sixteen fractions were collected, each fraction was dried in a vacuum concentrator for the following step.

#### *Nano-HPLC-MS/MS analysis*

The fractions were re-suspended in 30  $\mu$ l solvent C (0.1% formic acid in water), separated by nano-LC and analyzed by on-line electrospray tandem mass spectrometry. The experiments were performed on a Nano Aquity UPLC system (Waters Corporation, Milford, MA, USA) connected to a quadrupole-Orbitrap mass spectrometer (Q-Exactive) (Thermo Fisher Scientific, Bremen, Germany) equipped with an online nano-electrospray ion source. 10  $\mu$ l peptide sample was loaded onto the trap column (Thermo Scientific Acclaim PepMap C18, 100  $\mu$ m x 2 cm), with a flow of 10  $\mu$ l/min for 3 min and subsequently separated on the analytical column (Acclaim PepMap C18, 75  $\mu$ m x 25 cm) with a linear gradient, from 2% solvent D (ACN with 0.1% formic acid) to 40% solvent D in 105 min. The column was re-equilibrated at initial conditions for 15 min. The column flow rate was maintained at 300 nL/min and column temperature was maintained at 40°C. The electrospray voltage of 2.2 kV versus the inlet of the mass spectrometer was used. The Q-Exactive mass spectrometer was operated in the data-dependent mode to switch automatically between MS and MS/MS acquisition. Survey full-scan MS spectra (m/z 350-1200) were acquired with a mass resolution of 70K, followed by ten sequential high energy collisional dissociation (HCD) MS/MS scans with a resolution of 17.5K. In all cases, one microscan was recorded by dynamic exclusion of 30 seconds. MS/MS fixed first mass was set at 100.

#### *Database searching*

Tandem mass spectra were extracted by Proteome Discoverer software (Thermo Fisher Scientific, version 1.4.0.288). Charge state de-convolution and de-isotoping were not performed. All MS/MS samples were analyzed by the Mascot (Matrix Science, London, UK; version 2.3.2). Mascot was set up to search the Mouse SwissProt database (Release 2016\_01\_06, 16747 entries) assuming the digestion



enzyme trypsin. Mascot was searched with a fragment ion mass tolerance of 0.050 Da and a parent ion tolerance of 10.0 PPM. Carbamidomethyl of cysteine and TMT-6plex of lysine and the n-terminus were specified in Mascot as fixed modifications. Oxidation of methionine was specified in Mascot as a variable modification.

#### *Quantitative data analysis*

Scaffold Q+ (version Scaffold\_4.3.4, Proteome Software Inc., Portland, OR, USA) was used to quantify Label Based Quantitation (TMT) peptide and protein identifications. Peptide identifications were accepted if they could be established at greater than 92.0% probability to achieve an FDR less than 1.0% by the Scaffold Local FDR algorithm. Protein identifications were accepted if they could be established at greater than 99.0% probability to achieve an FDR less than 1.0% and contained at least two unique peptides. Protein probabilities were assigned by the Protein Prophet algorithm (Nesvizhskii et al., 2003). Proteins that contained similar peptides and could not be differentiated based on MS/MS analysis alone were grouped to satisfy the principles of parsimony. Proteins sharing significant peptide evidence were grouped into clusters. Channels were corrected by the matrix in all samples according to the algorithm described in i-Tracker (Shadforth et al., 2005). Acquired intensities in the experiment were globally normalized across all acquisition runs. Individual quantitative samples were normalized within each acquisition run. Intensities for each peptide identification were normalized to the assigned protein. The reference channels were normalized to produce a 1:1 fold change. All normalization calculations were performed by using medians to multiplicatively normalize data. Differentially expressed proteins were determined by Permutation Test analysis using Bonferroni multiple testing corrections.

#### *Bioinformatic analysis*

Ingenuity Pathway Analysis (IPA) software was applied as a systems biology approach to explore the statistically significant molecular networks or pathways in which proteins from *Emc10*<sup>+/+</sup> and *Emc10*<sup>-/-</sup> mice were expressed differently. Briefly,

all the MS/MS data were submitted to IPA (<http://www.ingenuity.com>), followed by analysis and interpretation in default parameters. Fisher test was applied and pathway enrichment was performed.

## **References**

Gilar M., Olivova P., Daly A.E., Gebler J.C. 2005. Two-dimensional separation of peptides using RP-RP-HPLC system with different pH in first and second separation dimensions. *J Sep Sci* 28:1694-1703.

Nesvizhskii A.I., Keller A., Kolker E., Aebersold R. 2003. A statistical model for identifying proteins by tandem mass spectrometry. *Anal Chem* 75:4646-4658.

Shadforth I.P., Dunkley T.P., Lilley K.S., Bessant C. 2005. i-Tracker: for quantitative proteomics using iTRAQ. *BMC Genomics* 6:145.

Supplementary Table S1. Proteins altered significantly with >1.5-fold expression in *Emc10*-null spermatozoa (KO) in comparison with wild-type (WT).

| Accession        | Protein Name                                                                 | Gene Name | Relative ratio (KO/WT) |
|------------------|------------------------------------------------------------------------------|-----------|------------------------|
| AT1A4_MOUSE      | Sodium/potassium-transporting ATPase subunit alpha-4                         | Atp1a4    | 0.31                   |
| AT1B3_MOUSE      | Sodium/potassium-transporting ATPase subunit beta-3                          | Atp1b3    | 0.31                   |
| A8DUK4_MOUSE     | Beta-globin                                                                  | Hbbt1     | 0.47                   |
| RNLS_MOUSE       | Renalase                                                                     | Rnls      | 0.55                   |
| DFB20_MOUSE      | Beta-defensin 20                                                             | Defb20    | 0.55                   |
| M4A13_MOUSE      | Membrane-spanning 4-domains subfamily A member 13                            | Ms4a13    | 0.55                   |
| Q497L9_MOUSE     | Protein Slc22a14                                                             | Slc22a14  | 0.63                   |
| E9PWQ7_MOUSE     | Zonadhesin                                                                   | Zan       | 0.63                   |
| DFB18_MOUSE      | Beta-defensin 18                                                             | Defb18    | 0.64                   |
| A0A1B0GSD2_MOUSE | Transporter                                                                  | Slc6a21   | 0.64                   |
| CN166_MOUSE      | UPF0568 protein C14orf166 homolog                                            | Null      | 1.50                   |
| A0A0R4J0D3_MOUSE | Dolichyl-diphosphooligosaccharide--protein glycosyltransferase subunit STT3B | Stt3b     | 1.50                   |
| ACTZ_MOUSE       | Alpha-centractin                                                             | Actr1a    | 1.50                   |
| RL35_MOUSE       | 60S ribosomal protein L35                                                    | Rpl35     | 1.50                   |
| SUGP2_MOUSE      | SURP and G-patch domain-containing protein 2                                 | Sugp2     | 1.50                   |
| E9Q1S3_MOUSE     | Protein transport protein Sec23A                                             | Sec23a    | 1.50                   |
| IFT56_MOUSE      | Intraflagellar transport protein 56                                          | Ttc26     | 1.50                   |
| E9Q284_MOUSE     | Coilin                                                                       | Coil      | 1.50                   |
| CBPM_MOUSE       | Carboxypeptidase M                                                           | Cpm       | 1.50                   |
| AP3D1_MOUSE      | AP-3 complex subunit delta-1                                                 | Ap3d1     | 1.50                   |
| IF5A1_MOUSE      | Eukaryotic translation initiation factor 5A-1                                | Eif5a     | 1.50                   |
| A0A087WQM0_MOUSE | Protein Tns1                                                                 | Tns1      | 1.50                   |
| PM34_MOUSE       | Peroxisomal membrane protein PMP34                                           | Slc25a17  | 1.50                   |
| RSSA_MOUSE       | 40S ribosomal protein SA                                                     | Rpsa      | 1.51                   |
| E9QA46_MOUSE     | Peroxisomal biogenesis factor 3                                              | Pex3      | 1.51                   |
| E9Q7K1_MOUSE     | Guanylate kinase                                                             | Guk1      | 1.51                   |
| RL14_MOUSE       | 60S ribosomal protein L14                                                    | Rpl14     | 1.51                   |
| ABCE1_MOUSE      | ATP-binding cassette sub-family E member 1                                   | Abce1     | 1.51                   |
| Q3U2G2_MOUSE     | Heat shock 70 kDa protein 4                                                  | Hspa4     | 1.51                   |
| XPO2_MOUSE       | Exportin-2                                                                   | Cse1l     | 1.51                   |
| DYHC2_MOUSE      | Cytoplasmic dynein 2 heavy chain 1                                           | Dync2h1   | 1.51                   |
| HNRPF_MOUSE      | Heterogeneous nuclear ribonucleoprotein F                                    | Hnrnpf    | 1.51                   |
| CAZA1_MOUSE      | F-actin-capping protein subunit alpha-1                                      | Capza1    | 1.51                   |
| CST8_MOUSE       | Cystatin-8                                                                   | Cst8      | 1.52                   |
| Q0PD67_MOUSE     | RAB1, member RAS oncogene family, isoform CRA_a                              | Rab1a     | 1.52                   |

|                  |                                                                               |               |      |
|------------------|-------------------------------------------------------------------------------|---------------|------|
| Q3U890_MOUSE     | Putative uncharacterized protein                                              | Hars          | 1.52 |
| A8W660_MOUSE     | ARD1 homolog B ( <i>S. cerevisiae</i> )                                       | Naa11         | 1.52 |
| Q3UW40_MOUSE     | Putative uncharacterized protein                                              | Rpl24         | 1.52 |
| IF4H_MOUSE       | Eukaryotic translation initiation factor 4H                                   | Eif4h         | 1.52 |
| EIF3I_MOUSE      | Eukaryotic translation initiation factor 3 subunit I                          | Eif3i         | 1.52 |
| UFL1_MOUSE       | E3 UFM1-protein ligase 1                                                      | Ufl1          | 1.52 |
| Q5SWZ5_MOUSE     | Myosin phosphatase Rho-interacting protein                                    | Mprip         | 1.52 |
| Q8CC70_MOUSE     | Protein 9230110C19Rik                                                         | 9230110C19Rik | 1.52 |
| B2RXB0_MOUSE     | Family with sequence similarity 71, member F2                                 | Fam71f2       | 1.52 |
| FHL5_MOUSE       | Four and a half LIM domains protein 5                                         | Fhl5          | 1.53 |
| DAD1_MOUSE       | Dolichyl-diphosphooligosaccharide--protein glycosyltransferase subunit DAD1   | Dad1          | 1.53 |
| ERGI2_MOUSE      | Endoplasmic reticulum-Golgi intermediate compartment protein 2                | Ergic2        | 1.53 |
| A0A0N4SW73_MOUSE | Rab11 family-interacting protein 5                                            | Rab11fip5     | 1.53 |
| F134C_MOUSE      | Protein FAM134C                                                               | Fam134c       | 1.53 |
| G5E8T3_MOUSE     | Signal recognition particle 19 kDa protein                                    | Srp19         | 1.53 |
| Q8BMA8_MOUSE     | Putative uncharacterized protein                                              | Eef2          | 1.53 |
| A0A087WQS2_MOUSE | Basic leucine zipper and W2 domain-containing protein 1                       | Bzw1          | 1.53 |
| IF2H_MOUSE       | Eukaryotic translation initiation factor 2 subunit 3, Y-linked                | Eif2s3y       | 1.53 |
| MYH10_MOUSE      | Myosin-10                                                                     | Myh10         | 1.53 |
| RL34_MOUSE       | 60S ribosomal protein L34                                                     | Rpl34         | 1.53 |
| B2RXQ4_MOUSE     | Nek1 protein                                                                  | Nek1          | 1.53 |
| CACO1_MOUSE      | Calcium-binding and coiled-coil domain-containing protein 1                   | Calcoco1      | 1.53 |
| SPAG1_MOUSE      | Sperm-associated antigen 1                                                    | Spag1         | 1.53 |
| G3UZX6_MOUSE     | Small ubiquitin-related modifier 3 (Fragment)                                 | Sumo3         | 1.53 |
| G5E924_MOUSE     | Heterogeneous nuclear ribonucleoprotein L (Fragment)                          | Hnrnpl        | 1.53 |
| H2B1A_MOUSE      | Histone H2B type 1-A                                                          | Hist1h2ba     | 1.53 |
| DBLOH_MOUSE      | Diablo homolog, mitochondrial                                                 | Diablo        | 1.54 |
| A0A0G2JH04_MOUSE | Eukaryotic translation initiation factor 4E                                   | Eif4e         | 1.54 |
| B2RXQ0_MOUSE     | MCG1039825                                                                    | Ttc30a2       | 1.54 |
| ATG3_MOUSE       | Ubiquitin-like-conjugating enzyme ATG3                                        | Atg3          | 1.54 |
| Q3U8B3_MOUSE     | Putative uncharacterized protein                                              | Rpa1          | 1.54 |
| SYIC_MOUSE       | Isoleucine--tRNA ligase, cytoplasmic                                          | Iars          | 1.54 |
| ACBD6_MOUSE      | Acyl-CoA-binding domain-containing protein 6                                  | Acbd6         | 1.54 |
| OST48_MOUSE      | Dolichyl-diphosphooligosaccharide--protein glycosyltransferase 48 kDa subunit | Ddost         | 1.54 |
| KIF2C_MOUSE      | Kinesin-like protein KIF2C                                                    | Kif2c         | 1.54 |

|                  |                                                                                     |          |      |
|------------------|-------------------------------------------------------------------------------------|----------|------|
| TDRD7_MOUSE      | Tudor domain-containing protein 7                                                   | Tdrd7    | 1.55 |
| IFT46_MOUSE      | Intraflagellar transport protein 46 homolog                                         | Ift46    | 1.55 |
| SYFA_MOUSE       | Phenylalanine--tRNA ligase alpha subunit                                            | Farsa    | 1.55 |
| TBCB_MOUSE       | Tubulin-folding cofactor B                                                          | Tbcb     | 1.55 |
| B9EHJ3_MOUSE     | Tight junction protein ZO-1                                                         | Tjp1     | 1.55 |
| PDIA3_MOUSE      | Protein disulfide-isomerase A3                                                      | Pdia3    | 1.55 |
| PLEC_MOUSE       | Plectin                                                                             | Plec     | 1.55 |
| SYEP_MOUSE       | Bifunctional glutamate/proline--tRNA ligase                                         | Eprs     | 1.55 |
| Q4VBX4_MOUSE     | MCG127675                                                                           | Ube2v2   | 1.56 |
| Q3TG12_MOUSE     | Putative uncharacterized protein (Fragment)                                         | Farsb    | 1.56 |
| RL13_MOUSE       | 60S ribosomal protein L13                                                           | Rpl13    | 1.56 |
| Q32MW4_MOUSE     | Allantoicase                                                                        | Allc     | 1.56 |
| Q4FJL2_MOUSE     | Reticulon                                                                           | Rtn1     | 1.56 |
| Q6A099_MOUSE     | MKIAA0248 protein (Fragment)                                                        | Gbf1     | 1.56 |
| F7D3N3_MOUSE     | Phytanoyl-CoA hydroxylase-interacting protein-like                                  | Phyhipl  | 1.56 |
| DYHC1_MOUSE      | Cytoplasmic dynein 1 heavy chain 1                                                  | Dync1h1  | 1.56 |
| Q7TSZ3_MOUSE     | Leucyl-tRNA synthetase                                                              | Lars     | 1.56 |
| Q0P5W2_MOUSE     | MCG129075                                                                           | Tmx4     | 1.56 |
| Q5RKP4_MOUSE     | Dolichyl-diphosphooligosaccharide--protein glycosyltransferase subunit 1 (Fragment) | Rpn1     | 1.57 |
| EIF3B_MOUSE      | Eukaryotic translation initiation factor 3 subunit B                                | Eif3b    | 1.57 |
| ABCF1_MOUSE      | ATP-binding cassette sub-family F member 1                                          | Abcf1    | 1.57 |
| B2RY64_MOUSE     | Enthd1 protein                                                                      | Enthd1   | 1.57 |
| IF2A_MOUSE       | Eukaryotic translation initiation factor 2 subunit 1                                | Eif2s1   | 1.58 |
| ASPC1_MOUSE      | Tether containing UBX domain for GLUT4                                              | Aspscr1  | 1.58 |
| NU214_MOUSE      | Nuclear pore complex protein Nup214                                                 | Nup214   | 1.58 |
| GTA1L_MOUSE      | N-acetyllactosaminide alpha-1,3-galactosyltransferase-like 1                        | Ggta1l1  | 1.58 |
| G3X9K4_MOUSE     | SAPS domain family, member 2, isoform CRA_a                                         | Ppp6r2   | 1.58 |
| DAAF1_MOUSE      | Dynein assembly factor 1, axonemal                                                  | Dnaaf1   | 1.58 |
| NCBP1_MOUSE      | Nuclear cap-binding protein subunit 1                                               | Ncbp1    | 1.58 |
| SPP2C_MOUSE      | Signal peptide peptidase-like 2C                                                    | Sppl2c   | 1.58 |
| DDX1_MOUSE       | ATP-dependent RNA helicase DDX1                                                     | Ddx1     | 1.58 |
| LY6A_MOUSE       | Lymphocyte antigen 6A-2/6E-1                                                        | Ly6a     | 1.59 |
| TMCO3_MOUSE      | Transmembrane and coiled-coil domain-containing protein 3                           | Tmco3    | 1.59 |
| F134A_MOUSE      | Protein FAM134A                                                                     | Fam134a  | 1.59 |
| MO4L1_MOUSE      | Mortality factor 4-like protein 1                                                   | Morf4l1  | 1.59 |
| A0A087WQD8_MOUSE | TRAF3-interacting protein 1                                                         | Traf3ip1 | 1.59 |
| MEIG1_MOUSE      | Meiosis-expressed gene 1 protein                                                    | Meig1    | 1.59 |

|                  |                                                                             |           |      |
|------------------|-----------------------------------------------------------------------------|-----------|------|
| E9PUZ5_MOUSE     | PRKCA-binding protein                                                       | Pick1     | 1.60 |
| GKAP1_MOUSE      | G kinase-anchoring protein 1                                                | Gkap1     | 1.60 |
| A2BGI8_MOUSE     | Peptidyl-prolyl cis-trans isomerase (Fragment)                              | Ppih      | 1.60 |
| KHDR1_MOUSE      | KH domain-containing, RNA-binding, signal transduction-associated protein 1 | Khdrbs1   | 1.60 |
| HSP7C_MOUSE      | Heat shock cognate 71 kDa protein                                           | Hspa8     | 1.60 |
| IF122_MOUSE      | Intraflagellar transport protein 122 homolog                                | Ift122    | 1.60 |
| NGLY1_MOUSE      | Peptide-N(4)-(N-acetyl-beta-glucosaminy)asparagine amidase                  | Ngly1     | 1.61 |
| LZTL1_MOUSE      | Leucine zipper transcription factor-like protein 1                          | Lztlf1    | 1.61 |
| E9QKB2_MOUSE     | Intracellular hyaluronan-binding protein 4                                  | Habp4     | 1.61 |
| PSME4_MOUSE      | Proteasome activator complex subunit 4                                      | Psme4     | 1.61 |
| PPM1G_MOUSE      | Protein phosphatase 1G                                                      | Ppm1g     | 1.61 |
| A2A9Q2_MOUSE     | Nardilysin                                                                  | Nrd1      | 1.62 |
| Q6ZQ61_MOUSE     | MCG121979, isoform CRA_c (Fragment)                                         | Matr3     | 1.62 |
| ACL7B_MOUSE      | Actin-like protein 7B                                                       | Actl7b    | 1.62 |
| TMED4_MOUSE      | Transmembrane emp24 domain-containing protein 4                             | Tmed4     | 1.62 |
| E9Q7F5_MOUSE     | Protein Gm6792                                                              | Gm6792    | 1.63 |
| CKAP4_MOUSE      | Cytoskeleton-associated protein 4                                           | Ckap4     | 1.63 |
| EF1B_MOUSE       | Elongation factor 1-beta                                                    | Eef1b     | 1.63 |
| HBS1L_MOUSE      | HBS1-like protein                                                           | Hbs1l     | 1.63 |
| A0A0U1RPL0_MOUSE | Ataxin-2-like protein                                                       | Atxn2l    | 1.63 |
| B1AVB4_MOUSE     | Protein Scml2                                                               | Scml2     | 1.63 |
| 1433E_MOUSE      | 14-3-3 protein epsilon                                                      | Ywhae     | 1.63 |
| PPP5_MOUSE       | Serine/threonine-protein phosphatase 5                                      | Ppp5c     | 1.63 |
| AIMP1_MOUSE      | Aminoacyl tRNA synthase complex-interacting multifunctional protein 1       | Aimp1     | 1.63 |
| TEX22_MOUSE      | Testis-expressed sequence 22 protein                                        | Tex22     | 1.64 |
| B7ZP22_MOUSE     | Heterogeneous nuclear ribonucleoprotein A2/B1                               | Hnrnpa2b1 | 1.64 |
| 1433T_MOUSE      | 14-3-3 protein theta                                                        | Ywhaq     | 1.64 |
| B2RSU5_MOUSE     | Intraflagellar transport 140 homolog (Chlamydomonas)                        | Ift140    | 1.64 |
| ABCF2_MOUSE      | ATP-binding cassette sub-family F member 2                                  | Abcf2     | 1.64 |
| IMPA3_MOUSE      | Inositol monophosphatase 3                                                  | Impad1    | 1.64 |
| YBOX3_MOUSE      | Y-box-binding protein 3                                                     | Ybx3      | 1.64 |
| DNJC2_MOUSE      | DnaJ homolog subfamily C member 2                                           | Dnajc2    | 1.65 |
| LYAR_MOUSE       | Cell growth-regulating nucleolar protein                                    | Lyar      | 1.65 |
| MARE3_MOUSE      | Microtubule-associated protein RP/EB family member 3                        | Mapre3    | 1.65 |
| SIM23_MOUSE      | Small integral membrane protein 23                                          | Smim23    | 1.65 |
| SAE1_MOUSE       | SUMO-activating enzyme subunit 1                                            | Sae1      | 1.65 |
| SPC1L_MOUSE      | Speriolin-like protein                                                      | Spatc1l   | 1.65 |

|                  |                                                                 |          |      |
|------------------|-----------------------------------------------------------------|----------|------|
| B2MG_MOUSE       | Beta-2-microglobulin                                            | B2m      | 1.65 |
| SPS2_MOUSE       | Selenide, water dikinase 2                                      | Sephs2   | 1.65 |
| PX11C_MOUSE      | Peroxisomal membrane protein 11C                                | Pex11g   | 1.65 |
| A0A087WNR4_MOUSE | Testis-expressed sequence 35 protein                            | Tex35    | 1.66 |
| Q5ERI8_MOUSE     | CRS4C-6                                                         | AY761185 | 1.66 |
| ZMY10_MOUSE      | Zinc finger MYND domain-containing protein 10                   | Zmynd10  | 1.67 |
| B2M1R6_MOUSE     | Heterogeneous nuclear ribonucleoprotein K                       | Hnrnpk   | 1.67 |
| E9PVC5_MOUSE     | Eukaryotic translation initiation factor 4 gamma 1              | Eif4g1   | 1.67 |
| HSP7E_MOUSE      | Heat shock 70 kDa protein 14                                    | Hspa14   | 1.67 |
| A0A087WQ65_MOUSE | Lymphocyte antigen 6E (Fragment)                                | Ly6e     | 1.67 |
| A0A0R4IZY0_MOUSE | Thimet oligopeptidase                                           | Thop1    | 1.67 |
| A3KGG8_MOUSE     | Small kinetochore-associated protein                            | Knstrn   | 1.68 |
| LSM12_MOUSE      | Protein LSM12 homolog                                           | Lsm12    | 1.68 |
| PA2G4_MOUSE      | Proliferation-associated protein 2G4                            | Pa2g4    | 1.68 |
| BBS2_MOUSE       | Bardet-Biedl syndrome 2 protein homolog                         | Bbs2     | 1.68 |
| SDF2L_MOUSE      | Stromal cell-derived factor 2-like protein 1                    | Sdf2l1   | 1.69 |
| WDR19_MOUSE      | WD repeat-containing protein 19                                 | Wdr19    | 1.69 |
| A2RTT4_MOUSE     | MCG4297                                                         | Ube2n    | 1.69 |
| CB39L_MOUSE      | Calcium-binding protein 39-like                                 | Cab39l   | 1.69 |
| A2AR60_MOUSE     | Protein CASC4 (Fragment)                                        | Casc4    | 1.69 |
| TTC12_MOUSE      | Tetratricopeptide repeat protein 12                             | Ttc12    | 1.69 |
| Q5EBP9_MOUSE     | Tripartite motif-containing 28                                  | Trim28   | 1.69 |
| D3YUB9_MOUSE     | Polyadenylate-binding protein 2 (Fragment)                      | Pabpn1   | 1.69 |
| A8DV41_MOUSE     | Beta-globin                                                     | Hbbt2    | 1.69 |
| IMB1_MOUSE       | Importin subunit beta-1                                         | Kpnb1    | 1.69 |
| Q790I0_MOUSE     | Valyl-tRNA synthetase 2, isoform CRA_b                          | Vars     | 1.70 |
| E9QQ38_MOUSE     | Phospholipase DDHD1                                             | Ddhd1    | 1.70 |
| DC1L2_MOUSE      | Cytoplasmic dynein 1 light intermediate chain 2                 | Dync1li2 | 1.70 |
| SIA8C_MOUSE      | Sia-alpha-2,3-Gal-beta-1,4-GlcNAc-R:alpha 2,8-sialyltransferase | St8sia3  | 1.71 |
| 5NTC_MOUSE       | Cytosolic purine 5'-nucleotidase                                | Nt5c2    | 1.71 |
| CLUS_MOUSE       | Clusterin                                                       | Clu      | 1.71 |
| LIS1_MOUSE       | Platelet-activating factor acetylhydrolase IB subunit alpha     | Pafah1b1 | 1.71 |
| Q3TF87_MOUSE     | Putative uncharacterized protein                                | Dars     | 1.71 |
| A1L329_MOUSE     | Neighbor of Brca1 gene 1                                        | Nbr1     | 1.71 |
| F7CB97_MOUSE     | CAP-Gly domain-containing linker protein 1 (Fragment)           | Clip1    | 1.71 |
| PPIA_MOUSE       | Peptidyl-prolyl cis-trans isomerase A                           | Ppia     | 1.72 |
| IF4A2_MOUSE      | Eukaryotic initiation factor 4A-II                              | Eif4a2   | 1.72 |
| IF5_MOUSE        | Eukaryotic translation initiation factor 5                      | Eif5     | 1.72 |

|                  |                                                                              |               |      |
|------------------|------------------------------------------------------------------------------|---------------|------|
| IF2B_MOUSE       | Eukaryotic translation initiation factor 2 subunit 2                         | Eif2s2        | 1.73 |
| H11_MOUSE        | Histone H1.1                                                                 | Hist1h1a      | 1.73 |
| ARL3_MOUSE       | ADP-ribosylation factor-like protein 3                                       | Arl3          | 1.73 |
| E2F697_MOUSE     | GnT1IP-L                                                                     | Mgat4d        | 1.73 |
| B1AQZ2_MOUSE     | Kinesin-like protein                                                         | Kif3a         | 1.74 |
| IFT81_MOUSE      | Intraflagellar transport protein 81 homolog                                  | Ift81         | 1.74 |
| ASAP1_MOUSE      | Arf-GAP with SH3 domain, ANK repeat and PH domain-containing protein 1       | Asap1         | 1.74 |
| A0AUN0_MOUSE     | Sec23ip protein (Fragment)                                                   | Sec23ip       | 1.75 |
| HYOU1_MOUSE      | Hypoxia up-regulated protein 1                                               | Hyou1         | 1.75 |
| PSPC1_MOUSE      | Paraspeckle component 1                                                      | Pspc1         | 1.75 |
| Q0VBA8_MOUSE     | Plasminogen activator, urokinase                                             | Plau          | 1.76 |
| Q80U27_MOUSE     | Kinesin-like protein (Fragment)                                              | Kif3b         | 1.76 |
| B2RSW8_MOUSE     | Pericentriolar material 1                                                    | Pcm1          | 1.76 |
| PIWL1_MOUSE      | Piwi-like protein 1                                                          | Piwil1        | 1.77 |
| Q3V086_MOUSE     | DEAD box polypeptide 4                                                       | Ddx4          | 1.77 |
| CPIN1_MOUSE      | Anamorsin                                                                    | Ciapi1        | 1.77 |
| ENPP4_MOUSE      | Bis(5'-adenosyl)-triphosphatase enpp4                                        | Enpp4         | 1.77 |
| MCA3_MOUSE       | Eukaryotic translation elongation factor 1 epsilon-1                         | Eef1e1        | 1.78 |
| Q9EQR4_MOUSE     | Chloride channel calcium activated 2                                         | Clca3a2       | 1.78 |
| FCL_MOUSE        | GDP-L-fucose synthase                                                        | Tsta3         | 1.78 |
| E9PZ50_MOUSE     | Tudor domain-containing protein 6                                            | Tdrd6         | 1.78 |
| HS74L_MOUSE      | Heat shock 70 kDa protein 4L                                                 | Hspa4l        | 1.79 |
| EF1G_MOUSE       | Elongation factor 1-gamma                                                    | Eef1g         | 1.79 |
| WDR35_MOUSE      | WD repeat-containing protein 35                                              | Wdr35         | 1.79 |
| Q3UGE1_MOUSE     | Putative uncharacterized protein                                             | Trappc12      | 1.79 |
| AKAP1_MOUSE      | A-kinase anchor protein 1, mitochondrial                                     | Akap1         | 1.80 |
| Q9D9G7_MOUSE     | 1700074P13Rik protein                                                        | 1700074P13Rik | 1.80 |
| Q3V1Z5_MOUSE     | 40S ribosomal protein S4                                                     | Rps4l         | 1.80 |
| ERF3A_MOUSE      | Eukaryotic peptide chain release factor GTP-binding subunit ERF3A            | Gspt1         | 1.80 |
| PABP1_MOUSE      | Polyadenylate-binding protein 1                                              | Pabpc1        | 1.80 |
| E0CZ72_MOUSE     | Kinesin-like protein                                                         | Kif2a         | 1.80 |
| A2BFF7_MOUSE     | Dynein cytoplasmic 1 intermediate chain 2                                    | Dync1i2       | 1.80 |
| PPM1J_MOUSE      | Protein phosphatase 1J                                                       | Ppm1j         | 1.81 |
| D3YTR3_MOUSE     | RNA-binding protein MEX3D                                                    | Mex3d         | 1.81 |
| A0A0R4J225_MOUSE | Bernardinelli-Seip congenital lipodystrophy 2 homolog (Human), isoform CRA_a | Bscl2         | 1.82 |
| B2RQZ0_MOUSE     | Intraflagellar transport 57 homolog (Chlamydomonas)                          | Ift57         | 1.82 |
| A2AQL0_MOUSE     | Serine/threonine kinase 39, STE20/SPS1 homolog (Yeast)                       | Stk39         | 1.83 |
| B9EJ80_MOUSE     | PDZ domain containing 8                                                      | Pdzd8         | 1.83 |
| GIT1_MOUSE       | ARF GTPase-activating protein GIT1                                           | Git1          | 1.83 |



|                  |                                                                      |         |      |
|------------------|----------------------------------------------------------------------|---------|------|
| OCAD2_MOUSE      | OCIA domain-containing protein 2                                     | Ociad2  | 1.83 |
| A0A0R4J1E2_MOUSE | Elongation factor 1-delta                                            | Eef1d   | 1.83 |
| TEX2_MOUSE       | Testis-expressed sequence 2 protein                                  | Tex2    | 1.83 |
| A2RS22_MOUSE     | Coronin                                                              | Coro1b  | 1.84 |
| HSP72_MOUSE      | Heat shock-related 70 kDa protein 2                                  | Hspa2   | 1.84 |
| A0A0N4SVL0_MOUSE | Eukaryotic translation initiation factor 4 gamma 3                   | Eif4g3  | 1.84 |
| RAI14_MOUSE      | Ankycorbin                                                           | Rai14   | 1.84 |
| K1C13_MOUSE      | Keratin, type I cytoskeletal 13                                      | Krt13   | 1.84 |
| EF1A1_MOUSE      | Elongation factor 1-alpha 1                                          | Eef1a1  | 1.84 |
| B1AU75_MOUSE     | Nuclear autoantigenic sperm protein                                  | Nasp    | 1.85 |
| B2KF25_MOUSE     | T-complex protein 11                                                 | Tcp11   | 1.85 |
| B1ASP8_MOUSE     | Doublesex- and mab-3-related transcription factor B1 (Fragment)      | Dmrtb1  | 1.85 |
| O35539_MOUSE     | Hepatoma-derived growth factor                                       | Hdgfl1  | 1.85 |
| BSDC1_MOUSE      | BSD domain-containing protein 1                                      | Bsdc1   | 1.87 |
| PACS1_MOUSE      | Phosphofurin acidic cluster sorting protein 1                        | Pacs1   | 1.87 |
| ERGI3_MOUSE      | Endoplasmic reticulum-Golgi intermediate compartment protein 3       | Ergic3  | 1.88 |
| E9QK36_MOUSE     | WD repeat-containing protein 62                                      | Wdr62   | 1.88 |
| Q9DAE2_MOUSE     | Protein Rbmxl2                                                       | Rbmxl2  | 1.88 |
| TRXR3_MOUSE      | Thioredoxin reductase 3                                              | Txnrd3  | 1.88 |
| MESD_MOUSE       | LDLR chaperone MESD                                                  | Mesdc2  | 1.89 |
| A0A0A0MQN4_MOUSE | Ubiquitin-like modifier-activating enzyme ATG7                       | Atg7    | 1.89 |
| HOOK1_MOUSE      | Protein Hook homolog 1                                               | Hook1   | 1.89 |
| I1E4X6_MOUSE     | Phosphoinositide phospholipase C                                     | Plch1   | 1.90 |
| ASNA_MOUSE       | ATPase Asna1                                                         | Asna1   | 1.90 |
| K2C79_MOUSE      | Keratin, type II cytoskeletal 79                                     | Krt79   | 1.90 |
| E9Q4X2_MOUSE     | Protein Ugg2                                                         | Ugg2    | 1.90 |
| RL10L_MOUSE      | 60S ribosomal protein L10-like                                       | Rpl10l  | 1.91 |
| DJB11_MOUSE      | DnaJ homolog subfamily B member 11                                   | Dnajb11 | 1.91 |
| RPGR1_MOUSE      | X-linked retinitis pigmentosa GTPase regulator-interacting protein 1 | Rpgrip1 | 1.91 |
| E9PUQ5_MOUSE     | Golgin subfamily A member 2                                          | Golga2  | 1.91 |
| Q3THQ5_MOUSE     | Putative uncharacterized protein                                     | Stip1   | 1.93 |
| CYBP_MOUSE       | Calcyclin-binding protein                                            | Cacybp  | 1.93 |
| Q3TG02_MOUSE     | Putative uncharacterized protein                                     | Stt3a   | 1.93 |
| Q58E35_MOUSE     | MCG10168                                                             | Rplp1   | 1.93 |
| NP1L1_MOUSE      | Nucleosome assembly protein 1-like 1                                 | Nap1l1  | 1.93 |
| PSIP1_MOUSE      | PC4 and SFRS1-interacting protein                                    | Psip1   | 1.94 |
| Q9D4E6_MOUSE     | Polyadenylate-binding protein                                        | Pabpc6  | 1.94 |
| ENPL_MOUSE       | Endoplasmin                                                          | Hsp90b1 | 1.95 |
| Q8BMU5_MOUSE     | Putative uncharacterized protein                                     | Tusc3   | 1.98 |
| G3X9Z7_MOUSE     | Intraflagellar transport 88 homolog (Chlamydomonas)                  | Ift88   | 1.98 |
| AP2B1_MOUSE      | AP-2 complex subunit beta                                            | Ap2b1   | 1.98 |
| ASNS_MOUSE       | Asparagine synthetase [glutamine-                                    | Asns    | 1.98 |

|                  |                                                         |               |      |
|------------------|---------------------------------------------------------|---------------|------|
|                  | hydrolyzing]                                            |               |      |
| MEA1_MOUSE       | Male-enhanced antigen 1                                 | Mea1          | 1.98 |
| IFT52_MOUSE      | Intraflagellar transport protein 52 homolog             | Ift52         | 2.00 |
| CCD91_MOUSE      | Coiled-coil domain-containing protein 91                | Ccdc91        | 2.00 |
| F6QS57_MOUSE     | Protein Gm6792 (Fragment)                               | Gm6792        | 2.03 |
| B2RRH9_MOUSE     | Guanine monphosphate synthetase                         | Gmps          | 2.03 |
| B2RUF0_MOUSE     | Y box protein 2                                         | Ybx2          | 2.03 |
| A2ABY3_MOUSE     | Ethanolamine-phosphate cytidyltransferase               | Pcyt2         | 2.04 |
| Q3TEU8_MOUSE     | Coronin                                                 | Coro1c        | 2.04 |
| DFB40_MOUSE      | Beta-defensin 40                                        | Defb40        | 2.05 |
| Q91YS2_MOUSE     | Rangap1 protein                                         | Rangap1       | 2.05 |
| A2AUF7_MOUSE     | Rab9 effector protein with kelch motifs                 | Rabepk        | 2.05 |
| HS90A_MOUSE      | Heat shock protein HSP 90-alpha                         | Hsp90aa1      | 2.05 |
| EFHD2_MOUSE      | EF-hand domain-containing protein D2                    | Efhd2         | 2.05 |
| CLGN_MOUSE       | Calmegin                                                | Clgn          | 2.07 |
| IPO4_MOUSE       | Importin-4                                              | Ipo4          | 2.07 |
| Q14AA6_MOUSE     | GTP-binding nuclear protein Ran                         | 1700009N14Rik | 2.08 |
| COG4_MOUSE       | Conserved oligomeric Golgi complex subunit 4            | Cog4          | 2.08 |
| B9EIA2_MOUSE     | DNA segment, Chr 1, Pasteur Institute 1                 | D1Pas1        | 2.09 |
| CRBG3_MOUSE      | Beta/gamma crystallin domain-containing protein 3       | Crybg3        | 2.10 |
| MFGM_MOUSE       | Lactadherin                                             | Mfge8         | 2.10 |
| GLRX3_MOUSE      | Glutaredoxin-3                                          | Glrx3         | 2.16 |
| A0A0R4J2A3_MOUSE | Transketolase-like protein 2                            | Tktl2         | 2.17 |
| CREL2_MOUSE      | Cysteine-rich with EGF-like domain protein 2            | Creld2        | 2.18 |
| B1Q2L7_MOUSE     | Calsperin                                               | Calr3         | 2.18 |
| PEX13_MOUSE      | Peroxisomal membrane protein PEX13                      | Pex13         | 2.20 |
| LRC46_MOUSE      | Leucine-rich repeat-containing protein 46               | Lrrc46        | 2.21 |
| SPT20_MOUSE      | Spermatogenesis-associated protein 20                   | Spata20       | 2.21 |
| D3Z0Y8_MOUSE     | Ubiquitin thioesterase OTUB2                            | Otub2         | 2.21 |
| ERO1B_MOUSE      | ERO1-like protein beta                                  | Ero1b         | 2.22 |
| EWS_MOUSE        | RNA-binding protein EWS                                 | Ewsr1         | 2.22 |
| Q545B6_MOUSE     | MCG12955, isoform CRA_a                                 | Stmn1         | 2.25 |
| CHSP1_MOUSE      | Calcium-regulated heat stable protein 1                 | Carhsp1       | 2.26 |
| PGP_MOUSE        | Glycerol-3-phosphate phosphatase                        | Pgp           | 2.27 |
| CFA36_MOUSE      | Cilia- and flagella-associated protein 36               | Cfap36        | 2.28 |
| B1AZS9_MOUSE     | Peroxisredoxin-4 (Fragment)                             | Prdx4         | 2.28 |
| Q9D9Y4_MOUSE     | 1700029H14Rik protein                                   | 1700029H14Rik | 2.29 |
| ADNP_MOUSE       | Activity-dependent neuroprotector homeobox protein      | Adnp          | 2.29 |
| FXR1_MOUSE       | Fragile X mental retardation syndrome-related protein 1 | Fxr1          | 2.29 |
| RANG_MOUSE       | Ran-specific GTPase-activating protein                  | Ranbp1        | 2.38 |
| E9Q0C6_MOUSE     | Protein Gm14569                                         | Gm14569       | 2.42 |
| MMP7_MOUSE       | Matrilysin                                              | Mmp7          | 2.44 |

|                  |                                                        |          |      |
|------------------|--------------------------------------------------------|----------|------|
| Q91XK4_MOUSE     | Nuclear transition protein 2                           | Tnp2     | 2.50 |
| CCD54_MOUSE      | Coiled-coil domain-containing protein 54               | Ccdc54   | 2.53 |
| PPID_MOUSE       | Peptidyl-prolyl cis-trans isomerase D                  | Ppid     | 2.53 |
| TBC21_MOUSE      | TBC1 domain family member 21                           | Tbc1d21  | 2.56 |
| ARHG6_MOUSE      | Rho guanine nucleotide exchange factor 6               | Arhgef6  | 2.56 |
| H1T_MOUSE        | Histone H1t                                            | Hist1h1t | 2.57 |
| PEX14_MOUSE      | Peroxisomal membrane protein PEX14                     | Pex14    | 2.66 |
| B9EJ34_MOUSE     | Uncharacterized protein                                | AY761185 | 2.80 |
| C3U1R6_MOUSE     | Protamine 2                                            | Prm2     | 2.80 |
| Q3TT92_MOUSE     | Dihydropyrimidinase-related protein 3                  | Dpysl3   | 2.83 |
| Q3V2I7_MOUSE     | Cystatin                                               | Cstl1    | 2.83 |
| IPO5_MOUSE       | Importin-5                                             | Ipo5     | 2.89 |
| CT027_MOUSE      | UPF0687 protein C20orf27 homolog                       | Null     | 3.00 |
| TSKS_MOUSE       | Testis-specific serine kinase substrate                | Tsks     | 3.07 |
| SPERT_MOUSE      | Spermatid-associated protein                           | Spert    | 3.10 |
| PDILT_MOUSE      | Protein disulfide-isomerase-like protein of the testis | Pdilt    | 3.11 |
| A0A0J9YV03_MOUSE | Protein FAM187B                                        | Fam187b  | 3.22 |
| Q9D548_MOUSE     | Cellular nucleic acid binding protein 2                | Zcchc13  | 3.22 |
| E9Q3A0_MOUSE     | E3 ubiquitin-protein ligase Trim36                     | Trim36   | 3.48 |
| KIF5C_MOUSE      | Kinesin heavy chain isoform 5C                         | Kif5c    | 3.50 |
| F8WIV1_MOUSE     | Zinc finger B-box domain-containing protein 1          | Zbbx     | 3.78 |
| TM247_MOUSE      | Transmembrane protein 247                              | Tmem247  | 4.09 |
| CABS1_MOUSE      | Calcium-binding and spermatid-specific protein 1       | Cabs1    | 4.40 |

---
